# Supplementary material for: Trace Elements in Medicinal Plants Traditionally Used in the Treatment of Diabetes—Do They Have a Role in the Claimed Therapeutic Effect?
Source: MDPI journal article supplement (doi:10.3390/foods11050667), 2022-02-24
Supplement: s1 [file s1]

## Supplementary Materials

**Table S1.** Products' brand (manufacturer) / geographic origin.

| #Product | Plant . brand | Plant material, plant species and botanical family                               | Brand (manufacturer) / geographic origin |
|----------|---------------|----------------------------------------------------------------------------------|------------------------------------------|
| 1        | 1.1           | <i>Trigonellae foenugraeci semen, Trigonella foenum-graecum L., Fabaceae</i>     | Kawon - PL                               |
| 2        | 1.2           |                                                                                  | Farmwit - PL                             |
| 3        | 1.3           |                                                                                  | Dary Natyry - PL                         |
| 4        | 1.4           |                                                                                  | Ervanário Portuense - PT                 |
| 5        | 2.1           | <i>Maydis stigma, Zea mays L., Poaceae (Gramineae)</i>                           | Kawon - PL                               |
| 6        | 2.2           |                                                                                  | Flos - PL                                |
| 7        | 2.3           |                                                                                  | Ervanário Portuense - PT                 |
| 8        | 3.1           | <i>Ocimi Sancti folium, Ocimum sanctum L., Lamiaceae</i>                         | BioSamara - PT (Origin: <b>Índia</b> )   |
| 9        | 4.1           | <i>Azadirachti fructus, Azadirachta indica A. Juss., Meliaceae</i>               | BioSamara - PT (Origin: <b>Índia</b> )   |
| 10       | 5.1           | <i>Ginseng radix, Panax ginseng C.A. Meyer, Araliaceae</i>                       | Ervanário Portuense - PT                 |
| 11       | 6.1           | <i>Schisandrae fructus, Schisandra chinensis (Turcz.) Baill., Schisandraceae</i> | BioSamara - PT (Origin: <b>China</b> )   |
| 12       | 7.1           | <i>Astragali radix, Astragalus membranaceus (Fisch.) Bunge, Fabaceae</i>         | BioSamara - PT (Origin: <b>China</b> )   |
| 13       | 8.1           | <i>Mori folium, Morus alba L., Moraceae</i>                                      | Kawon - PL                               |
| 14       | 8.2           |                                                                                  | Flos - PL                                |
| 15       | 8.3           |                                                                                  | Dary Natyry - PL                         |
| 16       | 9.1           | <i>Phaseoli pericarpium, Phaseolus vulgaris L., Fabaceae</i>                     | Kawon - PL                               |
| 17       | 10.1          | <i>Taraxaci radix, Taraxacum officinale Weber ex Wiggers, Asteraceae</i>         | Kawon - PL                               |
| 18       | 10.2          |                                                                                  | Flos - PL                                |
| 19       | 10.2          |                                                                                  | Dary Natyry - PL                         |
| 20       | 11.1          | <i>Galege herba, Galega officinalis L., Fabaceae</i>                             | Flos - PL                                |
| 21       | 11.2          |                                                                                  | Farmwit - PL                             |
| 22       | 12.1          | <i>Silybi mariani fructus, Silybum marianum (L.) Gaertn., Asteraceae</i>         | Farmwit - PL                             |
| 23       | 12.2          |                                                                                  | Dary Natyry - PL                         |
| 24       | 12.3          |                                                                                  | Ol'Vita - PL                             |
| 25       | 13.1          | <i>Graminis rhizoma, Agropyron repens (L.) P. Beauv, Poaceae</i>                 | Kawon - PL                               |
| 26       | 13.2          |                                                                                  | Dary Natyry - PL                         |
| 27       | 14.1          | <i>Myrtilli folium, Vaccinium myrtillus L., Ericaceae</i>                        | Flos - PL                                |
| 28       | 14.2          |                                                                                  | Dary Natyry - PL                         |
| 29       | 15.1          | <i>Salviae folium, Salvia officinalis L., Lamiaceae</i>                          | Kawon - PL                               |
| 30       | 15.2          |                                                                                  | Flos - PL                                |
| 31       | 15.3          |                                                                                  | Farmwit - PL                             |
| 32       | 16.1          | <i>Menthae piperitae folium, Mentha x piperita L., Lamiaceae</i>                 | Kawon - PL                               |
| 33       | 16.2          |                                                                                  | Dary Natyry - PL                         |
| 34       | 16.3          |                                                                                  | Farmwit - PL                             |
| 35       | 17.1          | <i>Lavandulae flos, Lavandula angustifolia Mill., Lamiaceae</i>                  | Kawon - PL                               |
| 36       | 17.2          |                                                                                  | Flos - PL                                |
| 37       | 17.3          |                                                                                  | Dary Natyry - PL                         |
| 38       | 18.1          | <i>Ribis nigri folium, Ribes nigrum L., Grossulariaceae</i>                      | Flos - PL                                |
| 39       | 18.2          |                                                                                  | Dary Natyry - PL                         |
| 40       | 18.3          |                                                                                  | Farmwit - PL                             |
| 41       | 19.1          | <i>Valerianae radix, Valeriana officinalis L., Valerianaceae</i>                 | Kawon - PL                               |
| 42       | 19.2          |                                                                                  | Dary Natyry - PL                         |
| 43       | 20.1          | <i>Chamomillae anthodium, Chamomilla recutita (L.) Rauschert, Asteraceae</i>     | Kawon - PL                               |
| 44       | 20.1          |                                                                                  | Flos - PL                                |
| 45       | 20.1          |                                                                                  | Dary Natyry - PL                         |
| 46       | 21.1          | <i>Urticae folium, Urtica dioica L., Urtica urens L., Urticaceae</i>             | Kawon - PL                               |
| 47       | 21.2          |                                                                                  | Flos - PL                                |
| 48       | 21.3          |                                                                                  | Dary Natyry - PL                         |
| 49       | 22.1          | <i>Melissae folium, Melissa officinalis L., Lamiaceae</i>                        | Kawon - PL                               |
| 50       | 22.2          |                                                                                  | Dary Natyry - PL                         |
| 51       | 22.3          |                                                                                  | Farmwit - PL                             |
| 52       | 23.1          | <i>Equiseti herba, Equisetum arvense L., Equisetaceae</i>                        | Kawon - PL                               |
| 53       | 23.2          |                                                                                  | Dary Natyry - PL                         |
| 54       | 23.3          |                                                                                  | Farmwit - PL                             |

**Products 1 to 34** – Medicinal plants (**n=16**) with indication for diabetes treatment (“MP-for-diabetes” group). **Products 1-12** correspond to medicinal plants (**n=7**) with the well-established therapeutic use in diabetes according to WHO monographs (first and second categories, i.e., “uses supported by clinical data” and “uses described in pharmacopeias and well-established documents”). The digit after the dot indicates different brands (marketing companies). **Products 35 to 54** – Medicinal plants (**n=7**) with other therapeutic indication (“Other MP” group). **PT** – Portugal; **PL** – Poland. **Kawon** – located in Western Poland (Wielkopolska region). **Flos** – located in Western Poland (Wielkopolska region). **Farmwit** – located in Poland but registered in

the UK. **Dary Natury** – located in Eastern Poland (Podlaskie region). **Ol’Vita** – located in South-Western Poland (Dolnoslaskie region).

**Table S2.** ICP-MS operating conditions.

| Parameter                         | Value |
|-----------------------------------|-------|
| RF power (W)                      | 1550  |
| Cool flow (L/min)                 | 14.0  |
| Auxiliary argon flow rate (L/min) | 0.8   |
| Nebulizer flow rate (mL/min)      | 1.02  |
| Spray chamber temperature (°C)    | 2.7   |
| Number of replicates              | 3     |
| Dwell time (ms)                   | 0.05  |

**Table S3.** Elemental isotopes (m/z ratios) monitored and Limits of Detection (LOD) of the ICP-MS method.

| Elemental isotope      | LOD (µg/g) |
|------------------------|------------|
| <sup>7</sup> Li        | 0.002      |
| <sup>9</sup> Be        | 0.0002     |
| <sup>11</sup> B        | 1.402      |
| <sup>27</sup> Al       | 0.285      |
| <sup>45</sup> Sc       | 0.010      |
| <sup>51</sup> V        | 0.003      |
| <sup>52</sup> Cr       | 0.011      |
| <sup>55</sup> Mn       | 0.092      |
| <sup>59</sup> Co       | 0.0004     |
| <sup>60</sup> Ni       | 0.010      |
| <sup>65</sup> Cu       | 0.042      |
| <sup>66</sup> Zn       | 0.194      |
| <sup>75</sup> As       | 0.027      |
| <sup>82</sup> Se       | 0.022      |
| <sup>85</sup> Rb       | 0.010      |
| <sup>88</sup> Sr       | 0.010      |
| <sup>89</sup> Y        | 0.0004     |
| <sup>98</sup> Mo       | 0.009      |
| <sup>111</sup> Cd      | 0.0006     |
| <sup>121</sup> Sb      | 0.0005     |
| <sup>137</sup> Ba      | 0.092      |
| <sup>141</sup> Pr      | 0.00008    |
| <sup>146</sup> Nd      | 0.0003     |
| <sup>147</sup> Sm      | 0.0002     |
| <sup>153</sup> Eu      | 0.00008    |
| <sup>157</sup> Gd      | 0.0002     |
| <sup>159</sup> Tb      | 0.00006    |
| <sup>163</sup> Dy      | 0.00008    |
| <sup>165</sup> Ho      | 0.00007    |
| <sup>166</sup> Er      | 0.0002     |
| <sup>169</sup> Tm      | 0.00005    |
| <sup>172</sup> Yb      | 0.00012    |
| <sup>175</sup> Lu      | 0.0001     |
| <sup>205</sup> Tl      | 0.00010    |
| <sup>208</sup> Pb      | 0.007      |
| <sup>209</sup> Bi      | 0.0015     |
| <sup>238</sup> U       | 0.0002     |
| <sup>71</sup> Ga (IS)  |            |
| <sup>115</sup> In (IS) |            |
| <sup>195</sup> Pt (IS) |            |

IS – Internal Standard

**Table S4.** Levels ( $\mu\text{g/g}$ ) of **toxic trace elements** in medicinal plants as determined in their infusions (1 g sample : 100 ml boiling water).

| Prod | Pl/Br | Plant name                           | Be                     | Cd                     | Tl                     | Pb                     | As                     | Sb                     | Ni                    |
|------|-------|--------------------------------------|------------------------|------------------------|------------------------|------------------------|------------------------|------------------------|-----------------------|
| 1    | 1.1   | <i>Trigonellae foenugraeci semen</i> | nd                     | 0.0180<br>$\pm 0.0007$ | 0.0014<br>$\pm 0.0000$ | 0.0175<br>$\pm 0.0112$ | nd                     | nd                     | 3.078<br>$\pm 0.055$  |
| 2    | 1.2   |                                      | nd                     | 0.0072<br>$\pm 0.0006$ | 0.0018<br>$\pm 0.0001$ | 0.0293<br>$\pm 0.0101$ | 0.0256<br>$\pm 0.0120$ | nd                     | 1.314<br>$\pm 0.049$  |
| 3    | 1.3   |                                      | nd                     | 0.0086<br>$\pm 0.0004$ | 0.0006<br>$\pm 0.0001$ | 0.0158<br>$\pm 0.0105$ | nd                     | nd                     | 1.173<br>$\pm 0.053$  |
| 4    | 1.4   |                                      | nd                     | 0.0100<br>$\pm 0.0004$ | 0.0007<br>$\pm 0.0000$ | 0.0112<br>$\pm 0.0087$ | nd                     | nd                     | 0.635<br>$\pm 0.026$  |
| 5    | 2.1   | <i>Maydis stigma</i>                 | nd                     | 0.0011<br>$\pm 0.0002$ | 0.0005<br>$\pm 0.0001$ | 0.0141<br>$\pm 0.0010$ | 0.0415<br>$\pm 0.0037$ | 0.0010<br>$\pm 0.0002$ | 0.473<br>$\pm 0.030$  |
| 6    | 2.2   |                                      | 0.0003<br>$\pm 0.0001$ | 0.0011<br>$\pm 0.0002$ | 0.0004<br>$\pm 0.0001$ | 0.0167<br>$\pm 0.0017$ | 0.0437<br>$\pm 0.0031$ | 0.0014<br>$\pm 0.0001$ | 0.636<br>$\pm 0.023$  |
| 7    | 2.3   |                                      | nd                     | 0.0006<br>$\pm 0.0002$ | 0.0002<br>$\pm 0.0001$ | 0.0143<br>$\pm 0.0067$ | nd                     | 0.0022<br>$\pm 0.0013$ | 0.241<br>$\pm 0.059$  |
| 8    | 3.1   | <i>Ocimi Sancti folium</i>           | 0.0018<br>$\pm 0.0003$ | 0.0037<br>$\pm 0.0005$ | 0.0034<br>$\pm 0.0002$ | 0.0671<br>$\pm 0.0116$ | 0.0985<br>$\pm 0.0097$ | 0.0009<br>$\pm 0.0003$ | 0.840<br>$\pm 0.021$  |
| 9    | 4.1   | <i>Azadirachti fructus</i>           | nd                     | 0.0041<br>$\pm 0.0003$ | 0.0034<br>$\pm 0.0000$ | 0.0774<br>$\pm 0.0203$ | 0.0336<br>$\pm 0.0016$ | 0.0007<br>$\pm 0.0000$ | 0.388<br>$\pm 0.027$  |
| 10   | 5.1   | <i>Ginseng radix</i>                 | 0.0045<br>$\pm 0.0006$ | 0.0288<br>$\pm 0.0012$ | 0.0222<br>$\pm 0.0005$ | 0.0837<br>$\pm 0.0159$ | 0.0582<br>$\pm 0.0068$ | 0.0046<br>$\pm 0.0007$ | 0.644<br>$\pm 0.016$  |
| 11   | 6.1   | <i>Schisandrae fructus</i>           | 0.0047<br>$\pm 0.0001$ | 0.0190<br>$\pm 0.0005$ | 0.0025<br>$\pm 0.0001$ | 0.1362<br>$\pm 0.0209$ | 0.0853<br>$\pm 0.0055$ | 0.0064<br>$\pm 0.0010$ | 2.241<br>$\pm 0.044$  |
| 12   | 7.1   | <i>Astragali radix</i>               | 0.0034<br>$\pm 0.0018$ | 0.0097<br>$\pm 0.0018$ | 0.0093<br>$\pm 0.0001$ | 0.0164<br>$\pm 0.0041$ | 0.0895<br>$\pm 0.0065$ | 0.0073<br>$\pm 0.0010$ | 0.821<br>$\pm 0.015$  |
| 13   | 8.1   | <i>Mori folium</i>                   | nd                     | 0.0013<br>$\pm 0.0004$ | 0.0004<br>$\pm 0.0001$ | 0.0576<br>$\pm 0.0059$ | 0.0740<br>$\pm 0.0065$ | 0.0024<br>$\pm 0.0003$ | 1.628<br>$\pm 0.0619$ |
| 14   | 8.2   |                                      | nd                     | 0.0031<br>$\pm 0.0002$ | 0.0006<br>$\pm 0.0000$ | 0.1315<br>$\pm 0.0119$ | 0.1110<br>$\pm 0.0031$ | 0.0035<br>$\pm 0.0001$ | 1.609<br>$\pm 0.016$  |
| 15   | 8.3   |                                      | nd                     | 0.0022<br>$\pm 0.0003$ | 0.0004<br>$\pm 0.0000$ | 0.0747<br>$\pm 0.0164$ | 0.1272<br>$\pm 0.0060$ | 0.0060<br>$\pm 0.0024$ | 1.448<br>$\pm 0.038$  |
| 16   | 9.1   | <i>Phaseoli pericarpium</i>          | 0.0018<br>$\pm 0.0003$ | 0.0034<br>$\pm 0.0005$ | 0.0034<br>$\pm 0.0001$ | 0.0208<br>$\pm 0.0097$ | 0.0328<br>$\pm 0.0083$ | 0.0024<br>$\pm 0.0003$ | 0.750<br>$\pm 0.052$  |
| 17   | 10.1  | <i>Taraxaci radix</i>                | 0.0018<br>$\pm 0.0001$ | 0.0497<br>$\pm 0.0028$ | 0.0122<br>$\pm 0.0008$ | 0.0156<br>$\pm 0.0062$ | 0.0366<br>$\pm 0.0100$ | 0.0021<br>$\pm 0.0006$ | 2.534<br>$\pm 0.182$  |
| 18   | 10.2  |                                      | 0.0017<br>$\pm 0.0004$ | 0.0442<br>$\pm 0.0034$ | 0.0113<br>$\pm 0.0005$ | 0.0103<br>$\pm 0.0011$ | nd                     | 0.0010<br>$\pm 0.0002$ | 2.594<br>$\pm 0.068$  |
| 19   | 10.2  |                                      | 0.0022<br>$\pm 0.0003$ | 0.0357<br>$\pm 0.0017$ | 0.0055<br>$\pm 0.0003$ | 0.0165<br>$\pm 0.0049$ | nd                     | 0.0020<br>$\pm 0.0001$ | 2.072<br>$\pm 0.073$  |
| 20   | 11.1  | <i>Galege herba</i>                  | nd                     | 0.0090<br>$\pm 0.0005$ | 0.0147<br>$\pm 0.0007$ | 0.0432<br>$\pm 0.0200$ | nd                     | 0.0013<br>$\pm 0.0002$ | 0.557<br>$\pm 0.013$  |
| 21   | 11.2  |                                      | nd                     | 0.0030<br>$\pm 0.0004$ | 0.0028<br>$\pm 0.0000$ | 0.0235<br>$\pm 0.0059$ | nd                     | 0.0024<br>$\pm 0.0007$ | 2.158<br>$\pm 0.071$  |
| 22   | 12.1  | <i>Silybi mariani fructus</i>        | nd                     | 0.0716<br>$\pm 0.0074$ | 0.0148<br>$\pm 0.0002$ | 0.0206<br>$\pm 0.0019$ | nd                     | nd                     | 1.096<br>$\pm 0.029$  |
| 23   | 12.2  |                                      | nd                     | 0.0205<br>$\pm 0.0019$ | 0.0152<br>$\pm 0.0000$ | 0.0240<br>$\pm 0.0070$ | nd                     | nd                     | 0.486<br>$\pm 0.004$  |
| 24   | 12.3  |                                      | 0.0010<br>$\pm 0.0002$ | 0.0857<br>$\pm 0.0014$ | 0.0011<br>$\pm 0.0001$ | 0.0119<br>$\pm 0.0065$ | nd                     | 0.0012<br>$\pm 0.0003$ | 0.841<br>$\pm 0.008$  |
| 25   | 13.1  | <i>Graminis rhizoma</i>              | 0.0013<br>$\pm 0.0001$ | 0.0099<br>$\pm 0.0007$ | 0.0081<br>$\pm 0.0004$ | 0.0299<br>$\pm 0.0109$ | nd                     | 0.0030<br>$\pm 0.0003$ | 0.114<br>$\pm 0.008$  |
| 26   | 13.2  |                                      | 0.0036<br>$\pm 0.0003$ | 0.0219<br>$\pm 0.0007$ | 0.0129<br>$\pm 0.0010$ | 0.0306<br>$\pm 0.0071$ | 0.0508<br>$\pm 0.0079$ | 0.0033<br>$\pm 0.0004$ | 0.158<br>$\pm 0.008$  |
| 27   | 14.1  | <i>Myrtilli folium</i>               | 0.0014<br>$\pm 0.0003$ | 0.0260<br>$\pm 0.0008$ | 0.0225<br>$\pm 0.0012$ | 0.0173<br>$\pm 0.0050$ | 0.0960<br>$\pm 0.0097$ | 0.0012<br>$\pm 0.0001$ | 0.492<br>$\pm 0.009$  |
| 28   | 14.2  |                                      | 0.0021<br>$\pm 0.0002$ | 0.0129<br>$\pm 0.0004$ | 0.0092<br>$\pm 0.0001$ | 0.0204<br>$\pm 0.0066$ | 0.0350<br>$\pm 0.0026$ | 0.0015<br>$\pm 0.0003$ | 0.740<br>$\pm 0.022$  |

**Table S4.** Levels (µg/g) of **toxic trace elements** in medicinal plants as determined in their infusions (1 g sample : 100 ml boiling water). (cont.)

| Prod | Pl/Br | Plant name                      | Be                | Cd                | Tl                | Pb                | As                | Sb                | Ni              |
|------|-------|---------------------------------|-------------------|-------------------|-------------------|-------------------|-------------------|-------------------|-----------------|
| 29   | 15.1  | <i>Salviae folium</i>           | 0.0015<br>±0.0001 | 0.0048<br>±0.0002 | 0.0059<br>±0.0001 | 0.0676<br>±0.0154 | nd                | 0.0007<br>±0.0004 | 0.947<br>±0.005 |
| 30   | 15.2  |                                 | 0.0013<br>±0.0001 | 0.0023<br>±0.0002 | 0.0036<br>±0.0000 | 0.0294<br>±0.0090 | nd                | nd                | 0.622<br>±0.008 |
| 31   | 15.3  |                                 | 0.0007<br>±0.0002 | 0.0012<br>±0.0002 | 0.0018<br>±0.0001 | 0.0257<br>±0.0105 | nd                | 0.0013<br>±0.0016 | 0.774<br>±0.021 |
| 32   | 16.1  | <i>Menthae piperitae folium</i> | 0.0009<br>±0.0001 | 0.0040<br>±0.0006 | 0.0023<br>±0.0001 | 0.1010<br>±0.0177 | 0.0660<br>±0.0046 | 0.0007<br>±0.0003 | 1.235<br>±0.020 |
| 33   | 16.2  |                                 | 0.0005<br>±0.0002 | 0.0018<br>±0.0002 | 0.0022<br>±0.0001 | 0.0605<br>±0.0438 | 0.0588<br>±0.0043 | 0.0007<br>±0.0001 | 0.222<br>±0.011 |
| 34   | 16.3  |                                 | 0.0006<br>±0.0001 | 0.0129<br>±0.0002 | 0.0025<br>±0.0001 | 0.0488<br>±0.0055 | 0.0529<br>±0.0040 | 0.0009<br>±0.0001 | 1.239<br>±0.057 |
| 35   | 17.1  | <i>Lavandulae flos</i>          | 0.0009<br>±0.0002 | 0.0026<br>±0.0002 | 0.0024<br>±0.0000 | 0.0520<br>±0.0181 | 0.0510<br>±0.0078 | 0.0036<br>±0.0001 | 1.368<br>±0.047 |
| 36   | 17.2  |                                 | 0.0006<br>±0.0002 | 0.0025<br>±0.0003 | 0.0023<br>±0.0000 | 0.0366<br>±0.0098 | 0.0328<br>±0.0072 | 0.0015<br>±0.0000 | 1.097<br>±0.099 |
| 37   | 17.3  |                                 | 0.0013<br>±0.0007 | 0.0057<br>±0.0009 | 0.0029<br>±0.0002 | 0.0675<br>±0.0156 | 0.0375<br>±0.0042 | 0.0021<br>±0.0006 | 1.096<br>±0.075 |
| 38   | 18.1  | <i>Ribis nigri folium</i>       | 0.0011<br>±0.0004 | 0.0024<br>±0.0002 | 0.0034<br>±0.0000 | 0.0338<br>±0.0138 | 0.0415<br>±0.0046 | 0.0009<br>±0.0002 | 1.716<br>±0.025 |
| 39   | 18.2  |                                 | 0.0010<br>±0.0002 | 0.0067<br>±0.0008 | 0.0038<br>±0.0002 | 0.0425<br>±0.0042 | 0.0492<br>±0.0073 | 0.0016<br>±0.0001 | 2.006<br>±0.104 |
| 40   | 18.3  |                                 | 0.0020<br>±0.0001 | 0.0290<br>±0.0017 | 0.0052<br>±0.0002 | 0.0484<br>±0.0127 | 0.0467<br>±0.0019 | 0.0023<br>±0.0003 | 1.247<br>±0.016 |
| 41   | 19.1  | <i>Valerianae radix</i>         | 0.0018<br>±0.0000 | 0.0081<br>±0.0001 | 0.0261<br>±0.0012 | 0.0506<br>±0.0111 | 0.0822<br>±0.0062 | 0.0031<br>±0.0004 | 0.724<br>±0.032 |
| 42   | 19.2  |                                 | 0.0050<br>±0.0003 | 0.0399<br>±0.0043 | 0.0312<br>±0.0004 | 0.0486<br>±0.0119 | 0.0338<br>±0.0013 | 0.0031<br>±0.0003 | 1.472<br>±0.051 |
| 43   | 20.1  | <i>Chamomillae anthodium</i>    | 0.0005<br>±0.0000 | 0.0092<br>±0.0004 | 0.0011<br>±0.0001 | 0.0347<br>±0.0066 | 0.0678<br>±0.0073 | 0.0021<br>±0.0001 | 2.077<br>±0.016 |
| 44   | 20.2  |                                 | 0.0003<br>±0.0001 | 0.0102<br>±0.0006 | 0.0008<br>±0.0000 | 0.0324<br>±0.0111 | 0.0792<br>±0.0083 | 0.0020<br>±0.0004 | 1.862<br>±0.009 |
| 45   | 20.3  |                                 | 0.0103<br>±0.0079 | 0.0212<br>±0.0066 | 0.0025<br>±0.0014 | 0.0673<br>±0.0507 | 0.1053<br>±0.0185 | 0.0044<br>±0.0021 | 2.298<br>±0.027 |
| 46   | 21.1  | <i>Urticae folium</i>           | 0.0022<br>±0.0007 | 0.0078<br>±0.0018 | 0.0149<br>±0.0010 | 0.0642<br>±0.0124 | 0.0841<br>±0.0177 | 0.0035<br>±0.0013 | 0.873<br>±0.049 |
| 47   | 21.2  |                                 | 0.0008<br>±0.0001 | 0.0053<br>±0.0006 | 0.1191<br>±0.0056 | 0.0253<br>±0.0082 | 0.0638<br>±0.0064 | 0.0019<br>±0.0000 | 0.323<br>±0.004 |
| 48   | 21.3  |                                 | 0.0007<br>±0.0002 | 0.0046<br>±0.0004 | 0.0404<br>±0.0004 | 0.0392<br>±0.0079 | 0.0505<br>±0.0039 | 0.0022<br>±0.0001 | 0.398<br>±0.009 |
| 49   | 22.1  | <i>Melissae folium</i>          | 0.0003<br>±0.0002 | 0.0016<br>±0.0002 | 0.0021<br>±0.0000 | 0.0495<br>±0.0088 | 0.0708<br>±0.0060 | 0.0011<br>±0.0002 | 1.412<br>±0.014 |
| 50   | 22.2  |                                 | nd                | 0.0140<br>±0.0179 | 0.0020<br>±0.0001 | 0.1757<br>±0.2184 | 0.0289<br>±0.0104 | 0.0016<br>±0.0002 | 0.151<br>±0.006 |
| 51   | 22.3  |                                 | 0.0004<br>±0.0002 | 0.0050<br>±0.0004 | 0.0038<br>±0.0001 | 0.0726<br>±0.0101 | 0.0298<br>±0.0016 | 0.0013<br>±0.0001 | 1.025<br>±0.021 |
| 52   | 23.1  | <i>Equiseti herba</i>           | 0.0005<br>±0.0001 | 0.0175<br>±0.0096 | 0.0118<br>±0.0005 | 0.0461<br>±0.0378 | 0.0795<br>±0.0095 | 0.0024<br>±0.0001 | 0.835<br>±0.016 |
| 53   | 23.2  |                                 | 0.0010<br>±0.0000 | 0.0085<br>±0.0040 | 0.0058<br>±0.0001 | 0.0328<br>±0.0301 | 0.0559<br>±0.0035 | 0.0007<br>±0.0002 | 0.581<br>±0.023 |
| 54   | 23.3  |                                 | 0.0005<br>±0.0001 | 0.0056<br>±0.0002 | 0.0029<br>±0.0002 | 0.0376<br>±0.0029 | 0.1100<br>±0.0046 | 0.0033<br>±0.0007 | 0.646<br>±0.010 |

nd = “not detected”, i.e., results below the limit of detection (LOD). Prod = Product; Pl/Br = Plant / Brand.

**Table S5.** Summary of the results ( $\mu\text{g/g}$ ) for **other trace elements** in medicinal plants as determined in their infusions (1 g sample : 100 ml boiling water) according to claimed therapeutic effect.

| Element    | Therapeutic indication of the plant | Mean   | Standard deviation | Median        | 95% confidence interval |             |
|------------|-------------------------------------|--------|--------------------|---------------|-------------------------|-------------|
|            |                                     |        |                    |               | lower limit             | upper limit |
| <b>Li</b>  | Diabetes                            | 0.11   | 0.16               | 0.06          | 0.06                    | 0.17        |
|            | Other                               | 0.09   | 0.11               | 0.05          | 0.04                    | 0.14        |
| <b>Sr*</b> | Diabetes                            | 11.39  | 25.90              | <b>4.63</b>   | 2.76                    | 20.03       |
|            | Other                               | 15.39  | 11.57              | 15.05         | 9.98                    | 20.81       |
| Al         | Diabetes                            | 6.78   | 14.17              | 1.38          | 2.06                    | 11.51       |
|            | Other                               | 3.71   | 3.78               | 3.15          | 1.95                    | 5.48        |
| Rb         | Diabetes                            | 8.55   | 5.37               | 6.75          | 6.76                    | 10.34       |
|            | Other                               | 13.21  | 14.36              | 8.82          | 6.49                    | 19.93       |
| Ba         | Diabetes                            | 3.63   | 5.13               | 1.87          | 1.92                    | 5.34        |
|            | Other                               | 4.50   | 4.22               | 3.55          | 2.52                    | 6.47        |
| <b>Sc*</b> | Diabetes                            | 0.07   | 0.04               | <b>0.06</b>   | 0.06                    | 0.09        |
|            | Other                               | 0.15   | 0.13               | 0.10          | 0.09                    | 0.21        |
| Bi         | Diabetes                            | 0.052  | 0.045              | 0.034         | 0.037                   | 0.067       |
|            | Other                               | 0.066  | 0.029              | 0.069         | 0.052                   | 0.080       |
| Y          | Diabetes                            | 0.007  | 0.009              | 0.004         | 0.004                   | 0.009       |
|            | Other                               | 0.007  | 0.007              | 0.005         | 0.003                   | 0.010       |
| Nd         | Diabetes                            | 0.0051 | 0.0061             | 0.0025        | 0.0030                  | 0.0071      |
|            | Other                               | 0.0043 | 0.0049             | 0.0028        | 0.0020                  | 0.0066      |
| Er         | Diabetes                            | 0.0016 | 0.0011             | 0.0012        | 0.0012                  | 0.0019      |
|            | Other                               | 0.0013 | 0.0007             | 0.0012        | 0.0010                  | 0.0016      |
| Pr         | Diabetes                            | 0.0014 | 0.0017             | 0.0007        | 0.0009                  | 0.0020      |
|            | Other                               | 0.0012 | 0.0012             | 0.0009        | 0.0007                  | 0.0018      |
| Sm         | Diabetes                            | 0.0013 | 0.0013             | 0.0007        | 0.0009                  | 0.0017      |
|            | Other                               | 0.0011 | 0.0012             | 0.0008        | 0.0006                  | 0.0017      |
| Gd         | Diabetes                            | 0.0012 | 0.0013             | 0.0007        | 0.0008                  | 0.0017      |
|            | Other                               | 0.0012 | 0.0013             | 0.0009        | 0.0006                  | 0.0018      |
| Dy         | Diabetes                            | 0.0012 | 0.0013             | 0.0006        | 0.0008                  | 0.0016      |
|            | Other                               | 0.0010 | 0.0011             | 0.0008        | 0.0005                  | 0.0015      |
| Eu         | Diabetes                            | 0.0010 | 0.0010             | 0.0008        | 0.0007                  | 0.0013      |
|            | Other                               | 0.0012 | 0.0008             | 0.0009        | 0.0008                  | 0.0016      |
| Yb         | Diabetes                            | 0.0007 | 0.0009             | 0.0004        | 0.0004                  | 0.0010      |
|            | Other                               | 0.0005 | 0.0005             | 0.0005        | 0.0003                  | 0.0007      |
| <b>Tb*</b> | Diabetes                            | 0.0006 | 0.0005             | <b>0.0006</b> | 0.0004                  | 0.0007      |
|            | Other                               | 0.0012 | 0.0008             | 0.0007        | 0.0008                  | 0.0015      |
| Ho         | Diabetes                            | 0.0005 | 0.0009             | 0.0001        | 0.0002                  | 0.0008      |
|            | Other                               | 0.0003 | 0.0003             | 0.0002        | 0.0002                  | 0.0005      |
| Tm         | Diabetes                            | 0.0004 | 0.0009             | 0.0000        | 0.0001                  | 0.0007      |
|            | Other                               | 0.0002 | 0.0002             | 0.0001        | 0.0001                  | 0.0003      |
| Lu         | Diabetes                            | 0.0004 | 0.0009             | 0.0001        | 0.0001                  | 0.0007      |
|            | Other                               | 0.0002 | 0.0002             | 0.0002        | 0.0001                  | 0.0004      |

\*Statistically significant difference ( $p < 0.05$ ) between both groups (plants used for diabetes vs. other medicinal plants).
